# Supplementary material
Source: publisher site journal article supplement (https://www.spandidos-publications.com/8183/downloadSupplementary)
Supplement: Supplementary file 1 [file downloadSupplementary]

**Table SVII.** Heterogeneity test results.

| ID outcome                                 | Outcome                                                                                                                    | Exposure | Method                    | Q                         | Q <sub>df</sub> | Q P-value         |
|--------------------------------------------|----------------------------------------------------------------------------------------------------------------------------|----------|---------------------------|---------------------------|-----------------|-------------------|
| finngen_R12_CD2_INSITU_CERVIX_UTERI_EXALLC | Carcinoma <i>in situ</i> of cervix uteri (controls excluding all cancers)<br>id:finngen_R12_CD2_INSITU_CERVIX_UTERI_EXALLC | HMGN1    | MR Egger                  | 0.473791<br>0496725<br>05 | 2               | 0.789073722317714 |
|                                            |                                                                                                                            |          | Inverse variance weighted | 3.137111<br>6087792<br>9  | 3               | 0.370964551313898 |
|                                            |                                                                                                                            | TKT      | MR Egger                  | 2.364194<br>8410587<br>8  | 2               | 0.306634921280399 |
|                                            |                                                                                                                            |          | Inverse variance weighted | 4.853632<br>8601454<br>6  | 3               | 0.182834011712564 |
|                                            |                                                                                                                            | ZYG      | MR Egger                  | 1.649045<br>8454585<br>2  | 2               | 0.438444114298767 |
|                                            |                                                                                                                            |          | Inverse variance weighted | 1.785590<br>9396616<br>1  | 3               | 0.618075517572664 |

HMGN1, high-mobility group nucleosome-binding protein 1; TKT, transketolase; ZYG, zyxin; MR, Mendelian randomization.

**Table SVIII.** Results of the horizontal pleiotropy test of HMGN1.

| <b>ID exposure</b>                          | <b>ID outcome</b>                           | <b>Outcome</b>                                                                                                          | <b>Exposure</b> | <b>Egger intercept</b> | <b>SE</b>         | <b>P-value</b>    |
|---------------------------------------------|---------------------------------------------|-------------------------------------------------------------------------------------------------------------------------|-----------------|------------------------|-------------------|-------------------|
| finngen_R12_CD2_INSITU_CERVIX_UTERI_EXAL_LC | finngen_R12_CD2_INSITU_CERVIX_UTERI_EXAL_LC | Carcinoma in situ of cervix uteri (controls excluding all cancers)   <br>id:finngen_R12_CD2_INSITU_CERVIX_UTERI_EXAL_LC | HMGN1           | 0.194595245582029      | 0.119239598342221 | 0.244274484127859 |

HMGN1, high-mobility group nucleosome-binding protein 1.
